# Supplementary material for: Determinants and Assembly Mechanism of Bacterial Community Structure in Ningxia Section of the Yellow River
Source: MDPI journal article supplement (doi:10.3390/microorganisms11020496), 2023-02-16
Supplement: s1 [file s1]

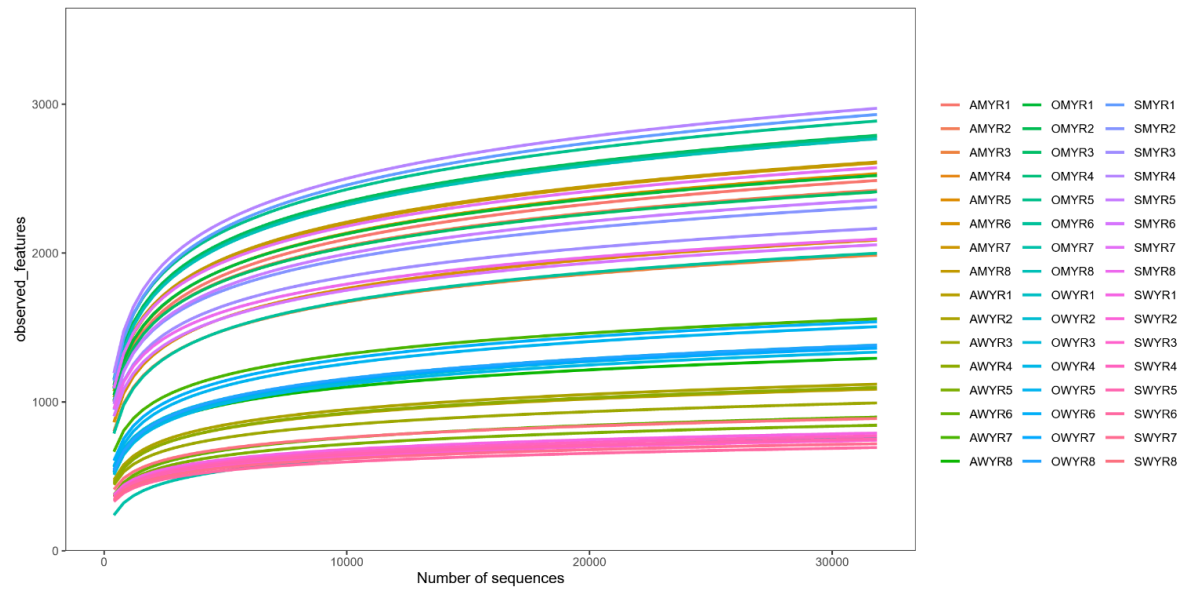

**Figure S1.** Rarefaction curves of bacterial richness of each sample

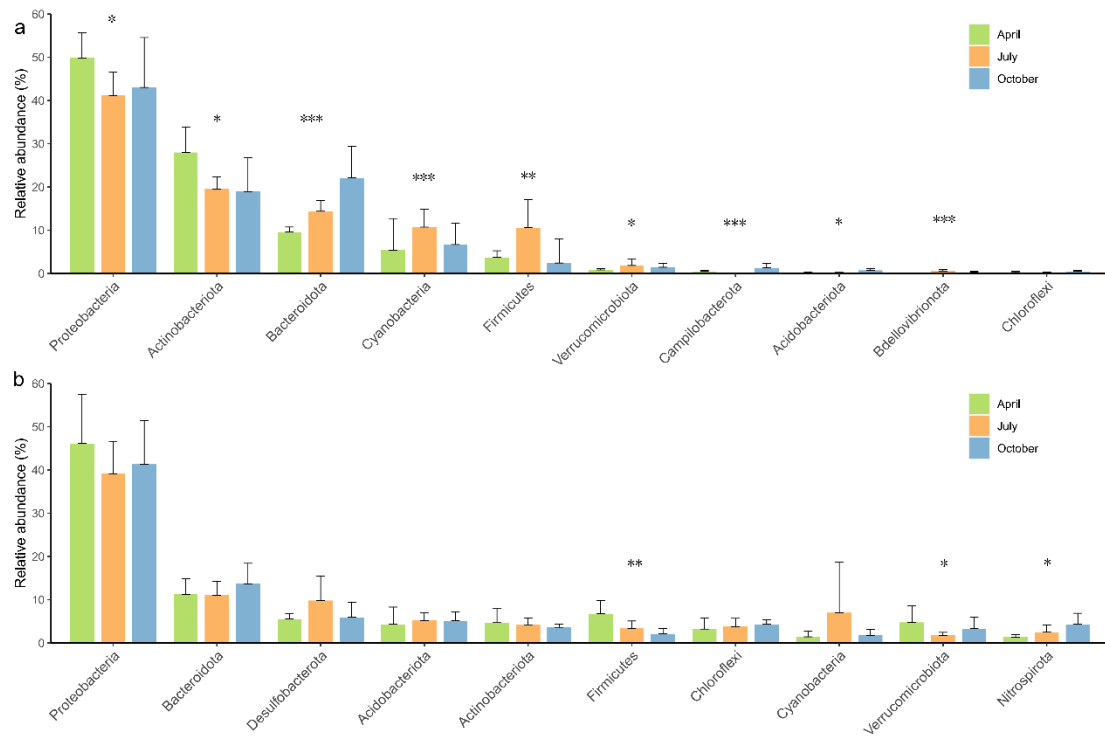

**Figure S2.** Relative abundance of different phyla among the three sampling periods. (a) water samples, (b) sediment samples. \* $p < 0.05$ , \*\*\*  $p < 0.001$ , Kruskal-Wallis test.

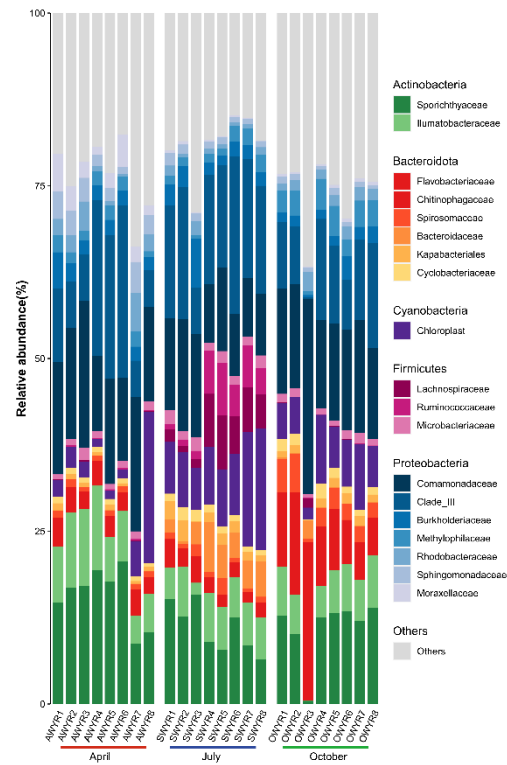

**Figure S3.** Relative abundances of the dominant bacterial families in water samples. Family with relative abundance <1% were defined as “other”.

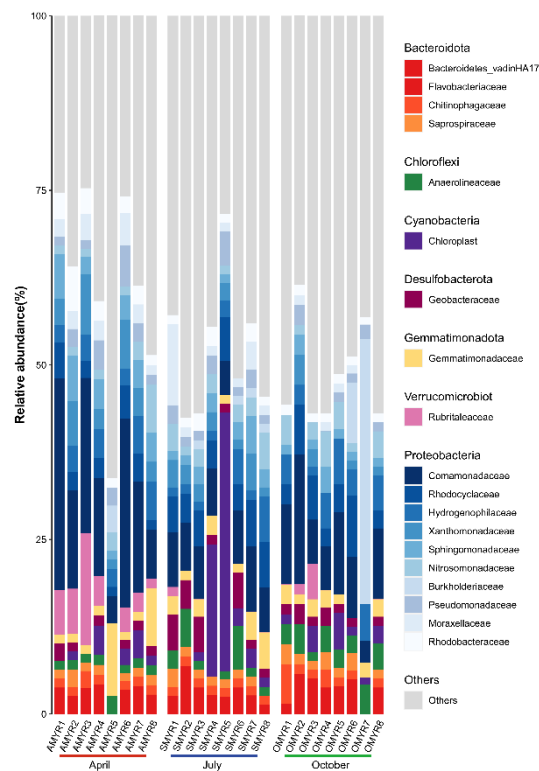

**Figure S4.** Relative abundances of the dominant bacterial families in sediment samples. Family with relative abundance <1% were defined as “other”.

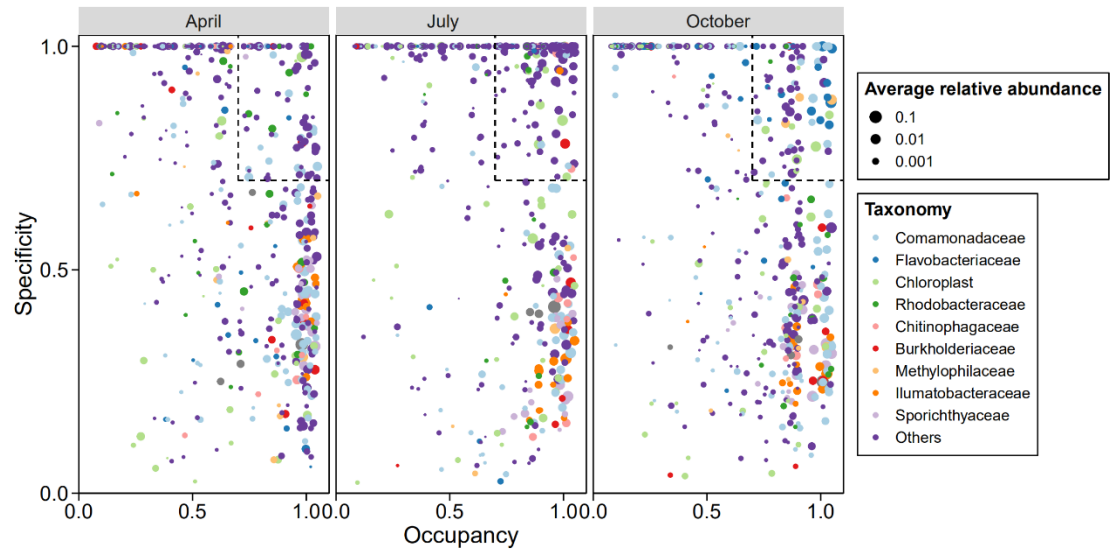

Figure S5. The SPEC-OCCU plots(a) over three sampling periods in water at the family level.

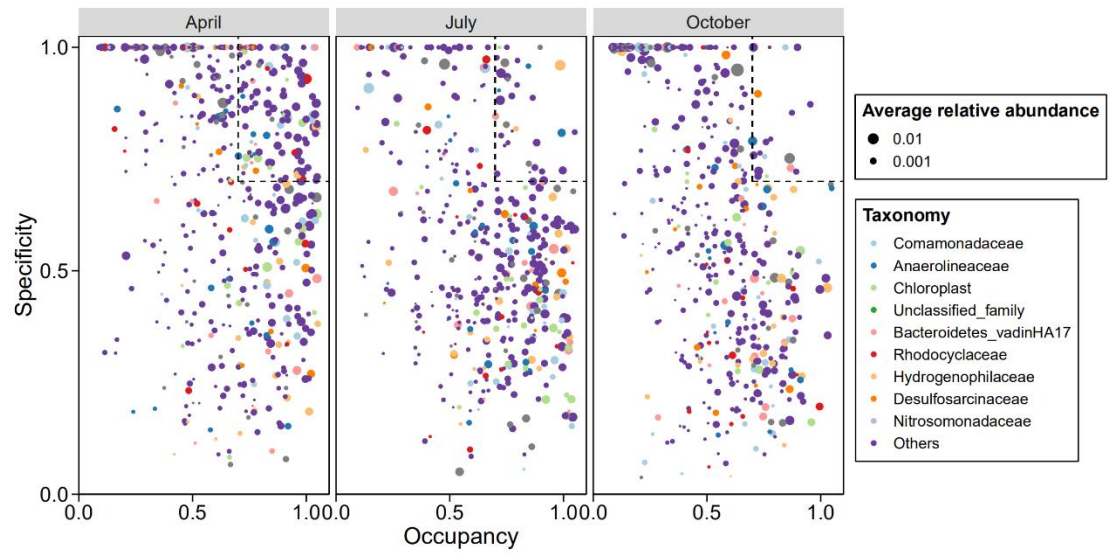

Figure S6. The SPEC-OCCU plots(a) over three sampling periods in sediment at the family level.
