# Supplementary material for: Determinants and Assembly Mechanism of Bacterial Community Structure in Ningxia Section of the Yellow River
Source: Microorganisms. 2023 Feb 16;11(2):496. doi: 10.3390/microorganisms11020496 (PMC9967387; doi:10.3390/microorganisms11020496)
Supplement: Supplementary file 1 [file microorganisms-11-00496-s001.zip › microorganisms-2198411-Supplementary Tables.xlsx]

## Sheet: Table S1
Alpha diversity indices of samples based on ASVs
Sample ID	Sample source	Season	No. of ASVs	ACE	Chao1	Shannon	Simpson	Pielou_e
AWYR1	water	April	897	915.428	910.674	7.637	0.981	0.779
AWYR2	water	April	925	941.248	940.667	7.769	0.985	0.788
AWYR3	water	April	800	809.285	808.552	7.752	0.986	0.804
AWYR4	water	April	831	841.298	841.439	6.636	0.939	0.684
AWYR5	water	April	705	715.315	715.56	6.72	0.949	0.71
AWYR6	water	April	724	732.246	729.661	6.4	0.931	0.674
AWYR7	water	April	1335	1352.15	1357.99	8.866	0.994	0.854
AWYR8	water	April	1070	1080.82	1077.84	7.966	0.984	0.792
JWYR1	water	July	799	807.775	813.588	7.25	0.966	0.752
JWYR2	water	July	679	689.535	691.75	6.853	0.957	0.729
JWYR3	water	July	747	754.172	757.324	7.596	0.984	0.796
JWYR4	water	July	761	779.346	792.098	7.308	0.97	0.764
JWYR5	water	July	755	770.892	772.368	7.375	0.973	0.771
JWYR6	water	July	690	704.31	704.444	6.687	0.943	0.709
JWYR7	water	July	721	728.528	726.357	7.058	0.964	0.743
JWYR8	water	July	916	939.73	940.722	7.391	0.968	0.751
OWYR1	water	October	1269	1315.5	1308.39	7.906	0.984	0.767
OWYR2	water	October	1139	1174.26	1169.79	7.76	0.984	0.764
OWYR3	water	October	1077	1094.24	1104.5	8.228	0.99	0.817
OWYR4	water	October	1264	1316.99	1308.93	7.629	0.974	0.74
OWYR5	water	October	1269	1295.48	1292.34	7.865	0.98	0.763
OWYR6	water	October	1258	1288.65	1305.35	8.26	0.988	0.802
OWYR7	water	October	1161	1196.02	1190.67	7.85	0.98	0.771
OWYR8	water	October	1154	1189.97	1193.87	7.591	0.971	0.746
AMYR1	sediment	April	2001	2020.51	2037.25	9.935	0.998	0.906
AMYR2	sediment	April	2000	2017.21	2025.76	10.055	0.998	0.917
AMYR3	sediment	April	1630	1645.56	1657.81	9.048	0.993	0.848
AMYR4	sediment	April	2277	2292.67	2319.2	10.072	0.997	0.903
AMYR5	sediment	April	2086	2056.4	2111.33	10.014	0.997	0.908
AMYR6	sediment	April	1693	1707.96	1716.31	9.528	0.996	0.888
AMYR7	sediment	April	2083	2087.85	2112.05	10.131	0.998	0.919
AMYR8	sediment	April	2136	2119.06	2153.2	10.324	0.999	0.933
JMYR1	sediment	July	2897	2952.83	2986.1	10.318	0.995	0.897
JMYR2	sediment	July	2062	2040.68	2079.38	10.197	0.998	0.926
JMYR3	sediment	July	1997	1982.88	2014.07	10.104	0.998	0.922
JMYR4	sediment	July	3076	3151.69	3150.64	10.464	0.997	0.903
JMYR5	sediment	July	2084	2134.75	2158.53	9.223	0.989	0.837
JMYR6	sediment	July	1868	1851.14	1887.41	10.001	0.998	0.92
JMYR7	sediment	July	2507	2515.66	2537.88	10.48	0.999	0.928
JMYR8	sediment	July	1663	1624.17	1663.55	9.992	0.998	0.934
OMYR1	sediment	October	2343	2340.75	2387.61	10.27	0.998	0.917
OMYR2	sediment	October	2425	2433.89	2466.37	10.37	0.999	0.922
OMYR3	sediment	October	1871	1846.14	1879.76	9.993	0.998	0.919
OMYR4	sediment	October	2526	2518.76	2564.89	10.292	0.998	0.911
OMYR5	sediment	October	2819	2849.64	2922.46	10.567	0.999	0.922
OMYR6	sediment	October	1912	1947.74	1976.09	9.277	0.994	0.851
OMYR7	sediment	October	602	653.897	639.521	5.101	0.895	0.552
OMYR8	sediment	October	2506	2458.78	2546.1	10.324	0.998	0.914

## Sheet: TableS2
Variance inflation factor of the environmental parameters
Water		sediment
Environmental parameters	Variance inflation factor	Environmental parameters	Variance inflation factor
WT	27.6515	SOM	14.1863
pH	16.5176	TN	11.3234
DO	10.4143	NH4+-N	2.83409
Cond	420.699	TP	2.58139
Sal	6.85635	AP	18.314
TDS	456.167	Pb	4.77446
Chl a	10.7654	Hg	2.39778
TN	64.7521	As	5.08489
NH4+-N	19.0618	Cr	1.87942
TP	7.90511	Cd	1.59719
AP	4.45426
CODMn	7.47262
CODCr	3.51711
Cl-	8.40593
F-	9.36397
SO42-	24.6298

## Sheet: TableS3
Details of nodes contacted with the drive parameters
	Phylum	Order	Genus	Correlation
CODMn	Firmicutes	Ruminococcaceae	Ruminococcus	-0.760586
	Proteobacteria	Enterobacteriaceae	Klebsiella	-0.760569
	Bacteroidota	Cryomorphaceae	NS10_marine_group	-0.755311
	Proteobacteria	Hyphomonadaceae	Hirschia	-0.735636
	Firmicutes	Clostridiaceae	Clostridium_sensu_stricto_1	-0.729975
	Firmicutes	Ruminococcaceae	Subdoligranulum	-0.729499
	Actinobacteriota	Coriobacteriaceae	Collinsella	-0.72603
	Firmicutes	Lachnospiraceae	Anaerostipes	-0.725848
	Firmicutes	Lachnospiraceae	Fusicatenibacter	-0.716289
	Actinobacteriota	Bifidobacteriaceae	Bifidobacterium	-0.716177
	Firmicutes	Butyricicoccaceae	Butyricicoccus	-0.716043
	Firmicutes	Lachnospiraceae	Ruminococcus_torques_group	-0.715816
	Firmicutes	Lachnospiraceae	Eubacterium_ventriosum_group	-0.700266
	Proteobacteria	Comamonadaceae	Polaromonas	0.702011
	Proteobacteria	Methylophilaceae	Methylotenera	0.703147
	Proteobacteria	Burkholderiaceae	Ralstonia	0.727847
	Proteobacteria	Comamonadaceae	Sphaerotilus	0.748803
	Proteobacteria	Methylomonadaceae	Methylobacter	0.751219
	Bacteroidota	Flavobacteriaceae	Flavobacterium	0.781855
	Bacteroidota	Chitinophagaceae	Ferruginibacter	0.805217
	Fusobacteriota	Leptotrichiaceae	Hypnocyclicus	0.819782
	Proteobacteria	Methylophilaceae	Methylophilus	0.839581
Chl a	Proteobacteria	Comamonadaceae	Rhodoferax	0.726957
	Proteobacteria	Moraxellaceae	Acinetobacter	0.732971
	Proteobacteria	Solimonadaceae	Solimonas	-0.735343
	Actinobacteriota	Microbacteriaceae	Candidatus_Limnoluna	0.76944
	Bacteroidota	Kapabacteriales	Kapabacteriales	-0.715652
	Firmicutes	Carnobacteriaceae	Trichococcus	0.717616
	Proteobacteria	Mitochondria	Mitochondria	-0.761035
	Proteobacteria	Solimonadaceae	Hydrocarboniphaga	-0.759589
	Proteobacteria	Comamonadaceae	Acidovorax	0.729573
	Proteobacteria	Unknown_Family	Acidibacter	-0.797974
	Bacteroidota	Chitinophagaceae	Ferruginibacter	0.771329
	Proteobacteria	Enterobacteriaceae	Klebsiella	-0.71492
pH	Proteobacteria	Sphingomonadaceae	Sphingorhabdus	-0.773815
	Bacteroidota	Spirosomaceae	Flectobacillus	0.723006
	Actinobacteriota	Microbacteriaceae	Candidatus_Planktoluna	-0.786179
	Proteobacteria	Caulobacteraceae	Brevundimonas	-0.847041
	Proteobacteria	Moraxellaceae	Perlucidibaca	-0.707013
	Firmicutes	Veillonellaceae	Veillonella	-0.70954
	Proteobacteria	Rhodocyclaceae	Sulfuritalea	-0.732361
	Proteobacteria	Moraxellaceae	Agitococcus_lubricus_group	-0.7065
TP	Bacteroidota	Muribaculaceae	Muribaculaceae	-0.73431
	Proteobacteria	Rhizobiaceae	Ochrobactrum	0.810797
	Bacteroidota	Cyclobacteriaceae	Algoriphagus	0.78486
	Bacteroidota	Porphyromonadaceae	Porphyromonas	0.731806
